# Supplementary material for: Characterization of a Thermophilic and Inhibitor-Tolerant GH1 β-Glucosidase Present in a Hot Spring
Source: MDPI journal article supplement (doi:10.3390/w15193389), 2023-09-27
Supplement: s1 [file s1]

## Supplementary materials

### Alignment and translation

```
Wild_type: 1 ATG AAT AAA TAT CAT TTT CCA AAG GAT TTT ATT TGG GGA GTA GCT ACT TCA TCA TAT CAG
Optimized: 1 ATG AAC AAA TAC CAC TTC CCG AAA GAC TTC ATT TGG GGC GTT GCA ACC AGC AGC TAT CAA
M N K Y H F P K D F I W G V A T S S Y Q

Wild_type: 61 ATT GAA GGT GCT TAC AAT GAA GAT GGA AAA GGA GAA AAT ATA TGG GAT AGA TTT ACT TCT
Optimized: 61 ATC GAA GGC GCG TAT AAC GAA GAC GGC AAA GGC GAA AAC ATC TGG GAT CGT TTT ACC AGC
I E G A Y N E D G K G E N I W D R F T S

Wild_type: 121 ATA CCA GGT AAC ATA TAT AAA AAT CAT AAT GGT AAT GTA GCG TGT GAC CAT TAT CAT TTA
Optimized: 121 ATC CCG GGC AAC ATC TAC AAA AAC CAC AAC GGC AAC GTT GCT TGC GAT CAT TAC CAT CTG
I P G N I Y K N H N G N V A C D H Y H L

Wild_type: 181 TAT GAA AAG GAT ATA GAG ATA TTA GAA GAA CTA GGT ATT AAA AAC TAC AGA CTT TCA ATA
Optimized: 181 TAC GAG AAA GAC ATC GAG ATC CTG GAA GAA CTG GGC ATC AAA AAC TAC CGT CTG AGC ATC
Y E K D I E I L E E L G I K N Y R L S I

Wild_type: 241 TCA TGG GCA AGA ATA TTT CCA AAG GGA TAC GGA GAG GTA AAT CAA AAG GGA CTA GAG TTT
Optimized: 241 AGC TGG GCA CGT ATT TTT CCG AAA GGC TAC GGC GAA GTT AAT CAG AAA GGC CTG GAG TTC
S W A R I F P K G Y G E V N Q K G L E F

Wild_type: 301 TAT AAA AAA TTA ATA AAT AAA TTG GTA AGC AAG GGT ATT CAA CCT GCA GTA ACG CTA TAT
Optimized: 301 TAC AAA AAA CTG ATC AAC AAA CTG GTG TCC AAA GGC ATT CAG CCG GCA GTT ACC CTG TAT
Y K K L I N K L V S K G I Q P A V T L Y

Wild_type: 361 CAC TGG GAT TTG CCA CAA CAC CTT CAA GAC ATT GGG GGA TGG GCA AAT AGA AAG GTA GTA
Optimized: 361 CAT TGG GAT CTG CCG CAA CAT CTG CAA GAT ATT GGC GGT TGG GCG AAT CGC AAA GTT GTT
H W D L P Q H L Q D I G G W A N R K V V

Wild_type: 421 GAT TAT TTT GTT GAA TAT GCA GAG CTA ATG TTT AAG GAG TTT GGA GAT TTA GTT CCT ATA
Optimized: 421 GAT TAC TTC GTG GAG TAC GCC GAA CTG ATG TTC AAA GAG TTC GGC GAC CTG GTT CCG ATT
D Y F V E Y A E L M F K E F G D L V P I

Wild_type: 481 TGG ATT ACT CAT AAT GAA CCA TGG GTT GTT TCA ATG TTA GGT TAT GCT TGG GGA GTA CAT
Optimized: 481 TGG ATT ACC CAC AAC GAA CCG TGG GTT GTT AGT ATG CTG GGT TAC GCT TGG GGC GTT CAC
W I T H N E P W V V S M L G Y A W G V H

Wild_type: 541 GCA CCT GGC ATT AAG GAC TAT AAG ATG GCA GTA CAA GTT GCA CAC AAC GTA CTT TTA TCA
Optimized: 541 GCA CCG GGC ATT AAA GAC TAC AAA ATG GCG GTT CAG GTT GCA CAT AAC GTT CTG CTG AGC
A P G I K D Y K M A V Q V L A H N V L L S

Wild_type: 601 CAT GGA AAA GTT GTA AGG CTT TAT AGA AGC ATG AAT TTA AAG GGT AAA ATA GGT ATA ACT
Optimized: 601 CAC GGC AAA GTT GTT CGT CTG TAT CGT AGC ATG AAC CTG AAA GGC AAA ATC GGC ATC ACC
H G K V V R L Y R S M N L K G K I G I T

Wild_type: 661 TTA AAC CTA ATA ACT TCA TAC CCA AAT TCA ACT GAT GAA AAG GAT GTA TTA GCA GCA AAA
Optimized: 661 CTG AAC CTG ATT ACC AGC TAT CCG AAC AGC ACC GAC GAA AAA GAC GTT CTG GCA GCG AAA
L N L I T S Y P N S T D E K D V L A A K

Wild_type: 721 ATA TAT GAT GGG TTT GTA AAT AGA TGG TAC TTA GAC CCA GTA TTA AAG GGA AAG TAT CCT
Optimized: 721 ATC TAC GAC GGC TTC GTT AAC CGT TGG TAC CTG GAC CCG GTT CTG AAA GGC AAA TAC CCG
I Y D G F V N R W Y L D P V L K G K Y P

Wild_type: 781 GAT GAT ATG GTT AAG TTA TAT AAA GAA CAA AAT ATC CTT CCT GAG CTT AAC GAA GAG GAT
Optimized: 781 GAC GAC ATG GTT CAA CTG TAC AAA GAG CAG AAC ATC CTG CCG GAA CTG AAC GAA GAA GAC
D D M V K L Y K E Q N I L P E L N E E D

Wild_type: 841 ATG GAG ATA ATA AGC GAA AAA ATA GAC TTC CTA GGT ATA AAT TAT TAT ACA AGA GCA GTT
Optimized: 841 ATG GAG ATC ATC AGC GAG AAA ATC GAC TTC CTG GGC ATT AAC TAT TAT ACC GCG GCG GTT
M E I I S E K I D F L G I N Y Y T R A V

Wild_type: 901 GTA AAG TAT GAT GAA ACA TCT TAT CCA TTA AAG GCA ACA ACT ATA GAC TTA GAT AAT CCA
Optimized: 901 GTG AAA TAC GAC GAA ACC AGC TAT CCG CTG AAA GCA ACC ACC ATC GAT CTG GAT AAC CCG
V K Y D E T S Y P L K A T T I D L D N P

Wild_type: 961 AAA ACT CAA ATG GGA TGG GAA ATA TAT CCT CAA GGT TTA TAT GAT ATG CTT ACT TAT CTT
Optimized: 961 AAA ACC CAG ATG GGC TGG GAA ATC TAT CCG CAA GGT CTG TAC GAC ATG CTG ACC TAT CTG
K T Q M G W E I Y P Q G L Y D M L T Y L

Wild_type: 1021 CAT GAA ACT TAT GAT GGC ATA GAC ATA ATG ATT ACA GAA AAT GGA GCT GCA TTT AAC GAT
Optimized: 1021 CAC GAA ACC TAC GAC GGC ATC GAT ATC ATG ATC ACC GAA AAC GGC GCA GCG TTT AAC GAT
H E T Y D G I D I M I T E N G A A F N D

Wild_type: 1081 ATA GTA AAT TCA AAT GGT AAG GTT GTA GAT GAC GCT AGA ATA CAT TAT CTT TAT GAA CAT
Optimized: 1081 ATC GTC AAC AGC AAC GGC AAA GTG GTT GAC GAC GCG CGT ATC CAT TAT CTG TAC GAA CAC
I V N S N G K V V D D A R I H Y L Y E H

Wild_type: 1141 CTA AAA GTA GTT CAT AGA GCA ATT TCA GAG GGA GTT AAT CTT AAG GCA TAT TAC TTA TGG
Optimized: 1141 CTG AAA GTG GTT CAT CCG GCG ATT AGC GAA GGC GTT AAC CTG AAA GCG TAC TAT CTG TGG
L K V V H R A I S E G V N L K A Y Y L W

Wild_type: 1201 TCA TTC TTA GAT AAC TTT GAA TGG GCT GAA GGA TAT GAA AAA AGG TTT GGT ATT GTT TTT
Optimized: 1201 AGC TTC CTG GAT AAC TTC GAG TGG GCA GAA GGT TAC GAA AAA CCG TTC GGC ATC GTG TTC
S F L D N F E W A E G Y E K R F G I V F

Wild_type: 1261 GTA GAT TAC ACA AAC CAA AAC AGA ATA ATA AAG AAT AGC GGA TAT TGG TAT AGA GAT GTT
Optimized: 1261 GTG GAT TAC ACC AAC CAG AAC CGC ATC ATC AAA AAC AGC GGC TAC TGG TAT CGC GAC GTT
V D Y T N Q N R I I K N S G Y W Y R D V

Wild_type: 1321 ATT AAA AAT AAT GGA TTA AAT GAA TAA
Optimized: 1321 ATC AAA AAC AAC GGC CTG AAC GAG TGA
I K N N G L N E *
```

Supplementary Figure S1 Gene Optimization of thbg2. Wild\_type represents t

he original gene sequence of the thbg2 from the metagenomic database. Optimized represents the optimized sequence of the thbg2 based on the codon of *E. coli*.

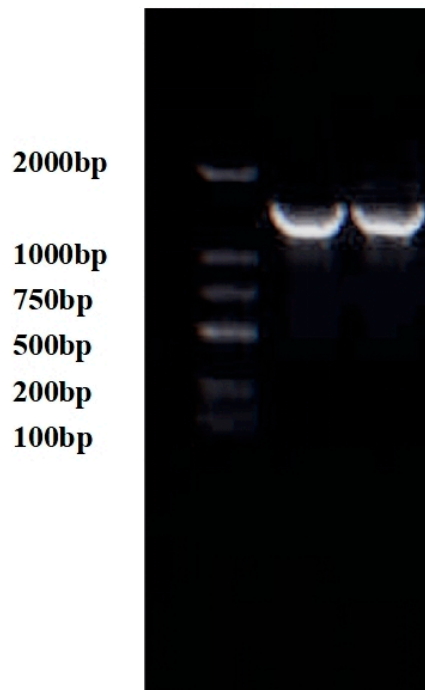

**Supplementary Figure S2** PCR amplification products

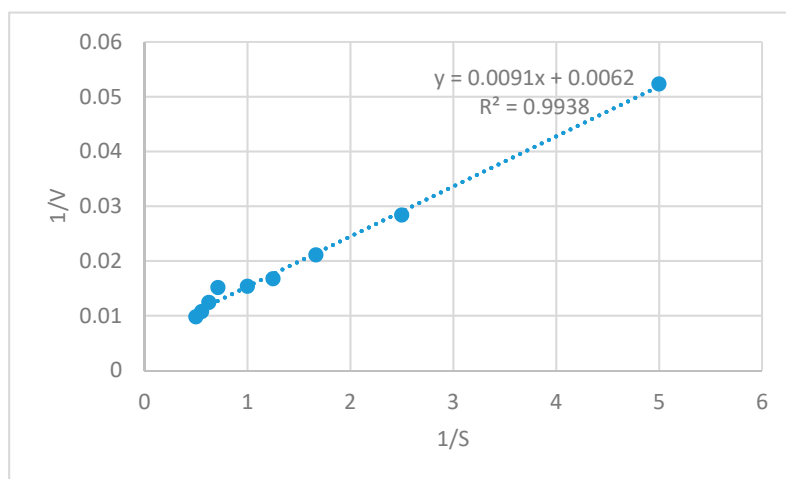

**Supplementary Figure S3** Lineweaver-Burk plot of ThBg2  $\beta$ -glucosidase

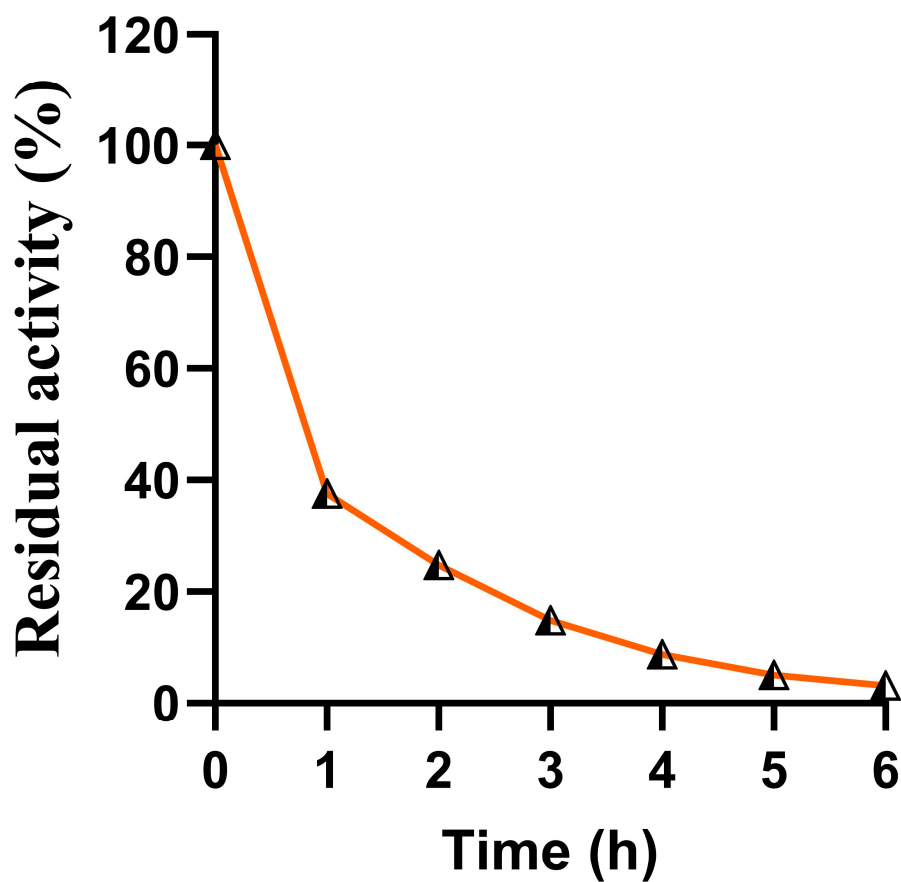

**Supplementary Figure S4** The effect of temperature on stability of the commercial cellulase at 50 °C for 0, 1, 2, 3, 4, 5, and 6 h. The residual activity of the commercial cellulase was determined at 50 °C and pH5.6 using 1% sodium carboxymethyl cellulose as substrate. Cellulase activity was determined by DNS method.
